## Sensitivity and Specificity of Information Criteria

John J. Dziak,<sup>1\*</sup>

Donna L. Coffman,<sup>2</sup>

Stephanie T. Lanza,<sup>3</sup>

Runze Li,<sup>4</sup>

Lars S. Jermin<sup>5</sup>

October 22, 2018

<sup>1</sup> The Methodology Center, The Pennsylvania State University, University Park, PA, 16802, USA,

<sup>2</sup> Department of Epidemiology and Biostatistics, Temple University, Philadelphia, PA, 19122, USA,

<sup>3</sup> The Methodology Center, The Edna Bennett Pierce Prevention Research Center, and Department of Biobehavioral Health, The Pennsylvania State University, University Park, PA, 16802, USA,

<sup>4</sup> Department of Statistics and The Methodology Center, The Pennsylvania State University, University Park, PA, 16802, USA,

<sup>5</sup> Research School of Biology, Australian National University, Acton, ACT 2601, Australia; School of Biology & Environment Science, University College Dublin, Belfield, Dublin 4, Ireland; Earth Institute, University College Dublin, Belfield, Dublin 4, Ireland

\* The corresponding author is John J. Dziak, [jjd264@psu.edu](mailto:jjd264@psu.edu).

## Abstract

Information criteria (ICs) based on penalized likelihood, such as Akaike’s Information Criterion (AIC), the Bayesian Information Criterion (BIC), and sample-size-adjusted versions of them, are widely used for model selection in health and biological research. However, different criteria sometimes support different models, leading to discussions about which is the most trustworthy. Some researchers and fields of study habitually use one or the other, often without a clearly stated justification. They may not realize that the criteria may disagree. Others try to compare models using multiple criteria but encounter ambiguity when different criteria lead to substantively different answers, leading to questions about which criterion is best. In this paper we present an alternative perspective on these criteria that can help in interpreting their practical implications. Specifically, in some cases the comparison of two models using ICs can be viewed as equivalent to a likelihood ratio test, with the different criteria representing different alpha levels and BIC being a more conservative test than AIC. This perspective may lead to insights about how to interpret the ICs in more complex situations. For example, AIC or BIC could be preferable, depending on the relative importance one assigns to sensitivity versus specificity. Understanding the differences and similarities among the ICs can make it easier to compare their results and to use them to make informed decisions.

## 1 Introduction

Many model selection techniques have been proposed for different settings (for reviews see Miller, 2002; Pitt and Myung, 2002; Zucchini, 2000; Johnson and Omland, 2004). Among other considerations, researchers must balance sensitivity (suggesting enough parameters to accurately model the patterns, processes, or relationships in the data) with specificity (not suggesting nonexistent patterns, processes, or relationships). Several of the simplest and most popular model selection criteria can be discussed in a unified way as log-likelihood functions with simple penalties. These include Akaike’s Information Criterion (Akaike, 1973, AIC), the Bayesian Information Criterion (Schwarz, 1978, BIC), the sample-size-adjusted AIC or  $AIC_C$  of Hurvich and Tsai (1989), the “consistent AIC” (CAIC) of Bozdogan (1987), and

the sample-size-adjusted BIC (ABIC) of Sclove (1987) (see Table 1). Each of these ICs consists of a goodness-of-fit term plus a penalty to reduce the risk of overfitting, and each provides a standardized way to balance sensitivity and specificity.

Applying an IC involves choosing the model with the best penalized log-likelihood: that is, the highest value of  $\ell - A_n p$ , where  $\ell$  is the log-likelihood,  $A_n$  is a constant or a function of the sample size  $n$ , and  $p$  is the number of parameters in the model. For historical reasons, instead of finding the highest value of  $\ell$  minus a penalty, this is often expressed as finding the lowest value of  $-2\ell$  plus a penalty:

$$-2\ell + A_n p, \tag{1}$$

and we follow that convention here. Expression (1) is what Atkinson (1980) called the generalized information criterion; in this paper we simply refer to (1) as an IC. Expression (1) is sometimes replaced in practice by the practically equivalent  $G^2 + A_n p$ , where  $G^2$  is the deviance, defined as twice the difference in log-likelihood between the current model and the saturated model, that is, the model with the most parameters which is still identifiable (e.g., Collins and Lanza, 2010).

In practice, Expression (1) cannot be used directly without first choosing  $A_n$ . Specific choices of  $A_n$  make (1) equivalent to AIC, BIC, ABIC or CAIC. Thus, although motivated by different theories and goals, algebraically these criteria are only different values of  $A_n$  in (1), corresponding to different relative degrees of emphasis on parsimony, that is, on the number of free parameters in the selected model (Claeskens and Hjort, 2008; Lin and Dayton, 1997; Vrieze, 2012). Because the different ICs often do not agree, the question often arises as to which is best to use in practice. In this paper we examine this question by focusing on the similarities and differences among AIC, BIC, CAIC, and ABIC, especially in view of an analogy between their different complexity penalty weights  $A_n$  and the  $\alpha$  levels of hypothesis tests. We especially focus on AIC and BIC, which have been extensively studied theoretically (Pötscher, 1991; Atkinson, 1980; Kuha, 2004; Zhang, 1993; Ding *et al.*, 2018; Shao, 1997; Kadane and Lazar, 2004; Vrieze, 2012), and which are often used not only in their own right but as tuning criteria to improve the performance of more complex model selection techniques (e.g., in high-dimensional regression variable selection Wu and Ma, 2015; Narisetty and He, 2014; Wang

Table 1: Summary of Common Information Criteria

| Criterion               | Penalty Weight                         | Emphasis        | Likely Kind of Error |
|-------------------------|----------------------------------------|-----------------|----------------------|
| Non-consistent criteria |                                        |                 |                      |
| AIC                     | $A_n = 2$                              | Good prediction | Overfitting          |
| Consistent criteria     |                                        |                 |                      |
| ABIC                    | $A_n = \ln\left(\frac{n+2}{24}\right)$ | Depends on $n$  | Depends on $n$       |
| BIC                     | $A_n = \ln(n)$                         | Parsimony       | Underfitting         |
| CAIC                    | $A_n = \ln(n) + 1$                     | Parsimony       | Underfitting         |

*et al.*, 2007). The AIC and BIC are widely used in many important applications in bioinformatics, including in molecular phylogenetics (Posada, 2008; Darriba *et al.*, 2012; Jayaswal *et al.*, 2014; Kalyaanamoorthy *et al.*, 2017; Lefort *et al.*, 2017).

In the following section we review the motivation and theoretical properties of these ICs. We then discuss their application to a common application of model selection in medical, health and social scientific applications: that of choosing the number of classes in a latent class analysis (e.g., Collins and Lanza, 2010). Finally, we propose practical recommendations for using ICs to extract valuable insights from data while acknowledging their differing emphases.

## Common Penalized-Likelihood Information Criteria

In this section we review some commonly used ICs. Their formulas, as well as some of their properties which we describe later in the paper, are summarized for convenience in Table 1.

### Akaike’s Information Criterion (AIC)

First, the AIC Akaike (1973) sets  $A_n = 2$  in (1). It estimates the relative Kullback-Leibler (KL) divergence (a nonparametric measure of difference between distributions) of the likelihood function specified by a fitted candidate model, from the likelihood function governing the unknown true process that generated the data. The fitted model closest to the truth in the KL sense would not necessarily be the model that best fits the observed sample, since the *observed* sample can often be

fit arbitrary well by making the model more and more complex. Rather, the best  
KL model is the model that most accurately describes the population distribution  
or the process that produced the data. Such a model would not necessarily have  
the lowest error in fitting the data already observed (also known as the training  
sample) but would be expected to have the lowest error in predicting future data  
taken from the same population or process (also known as the test sample). This  
is an example of a bias-variance tradeoff (see, e.g., Hastie *et al.*, 2001).

Technically, the KL divergence can be written as  $E_t(\ell_t(y)) - E_t(\ell(y))$ , where  
 $E_t$  is the expected value under the unknown true distribution function,  $\ell$  is the  
log-likelihood of the data under the fitted model being considered, and  $\ell_t$  is the  
log-likelihood of the data under the unknown true distribution. This is intuitively  
understood as the difference between the estimated and the true distribution.  
 $E_t(\ell_t(y))$  will be the same for all models being considered, so KL is minimized  
by choosing the model with highest  $E_t(\ell(y))$ . The  $\ell(y)$  from the fitted model is  
a biased measure of  $E_t(\ell(y))$ , especially if  $p$  is large, because a model with many  
parameters can generally be fine-tuned to appear to fit a small dataset well, even if  
its structure is such that it cannot generalize to describe the process that generated  
the data. Intuitively, this means that if there are many parameters, the fit of the  
model to the originally obtained data (training sample) will seem good regardless  
of whether the model is correct or not, simply because the model is so flexible.  
In other words, once a particular dataset is used to estimate the parameters of a  
model, the fit of the model on that sample is no longer an independent evaluation of  
the quality of the model. The most straightforward way to address this fit inflation  
would be by cross-validation on a new sample, but AIC and similar criteria attempt  
to achieve something similar when there is no other sample (see Shao, 1993, 1997).

Akaike (1973) showed that an approximately unbiased estimate of  $E_t(\ell(y))$   
would be a constant plus  $\ell - \text{tr}(\hat{\mathbf{J}}^{-1}\hat{\mathbf{K}})$  (where  $\mathbf{J}$  and  $\mathbf{K}$  are two  $p \times p$  matrices,  
described below, and  $\text{tr}()$  is the trace, or sum of diagonal elements).  $\hat{\mathbf{J}}$  is  
an estimator for the covariance matrix of the parameters, based on the matrix of  
second derivatives of  $\ell$  in each of the parameters, and  $\hat{\mathbf{K}}$  is an estimator based  
on the cross-products of the first derivatives (see Claeskens and Hjort, 2008, pp.  
26-7). Akaike showed that  $\hat{\mathbf{J}}$  and  $\hat{\mathbf{K}}$  are asymptotically equal for the true model, so

that the trace becomes approximately  $p$ , the number of parameters in the model. 94  
For models that are far from the truth, the approximation may not be as good. 95  
However, poor models presumably have poor values of  $\ell$ , so the precise size of the 96  
penalty is less important (Burnham and Anderson, 2002). The resulting expres- 97  
sion  $\ell - p$  suggests using  $A_n = 2$  in (1) and concluding that fitted models with low 98  
values of (1) will be likely to provide a likelihood function closer to the truth. AIC 99  
is discussed further by Burnham and Anderson (2002, 2004) and Kuha (2004). 100

**Criteria Related to AIC.** When  $n$  is small or  $p$  is large, the crucial AIC 101  
approximation  $\text{tr}(\hat{\mathbf{J}}^{-1}\hat{\mathbf{K}}) \approx p$  is too optimistic and the resulting penalty for model 102  
complexity is too weak (Tibshirani and Knight, 1999; Hastie *et al.*, 2001). In the 103  
context of regression and time series models, several researchers (e.g., Sugiura, 104  
1978; Hurvich and Tsai, 1989; Burnham and Anderson, 2004) have suggested using 105  
a corrected version,  $\text{AIC}_C$ , which applies a slightly heavier penalty that depends 106  
on  $p$  and  $n$ ; it gives results very close to those of AIC when  $n$  is large relative to  $p$ . 107  
For small  $n$ , Hurvich and Tsai (1989) showed that  $\text{AIC}_C$  sometimes performs better 108  
than AIC. Theoretical discussions of model selection often focus on the advantages 109  
and disadvantages of AIC versus BIC, and  $\text{AIC}_C$  gets little attention because it 110  
is asymptotically equivalent to AIC. However, this equivalence is subject to the 111  
assumption that  $p$  is fixed and  $n$  becomes very large. Because in many situations 112  
 $p$  is comparable to  $n$  or larger,  $\text{AIC}_C$  may deserve more attention in future work. 113

Some other selection criteria are asymptotically equivalent to AIC, at least for 114  
linear regression. These include Mallows'  $C_p$  (see George, 2000), leave-one-out 115  
cross-validation (Shao, 1997; Stone, 1977), and the generalized cross- validation 116  
(GCV) statistic (see Golub *et al.*, 1979; Hastie *et al.*, 2001). Leave-one-out cross- 117  
validation involves fitting the candidate model on many subsamples of the data, 118  
each excluding one subject (i.e., participant or specimen), and observing the average 119  
squared error in predicting the extra response. Each approach is intended to correct 120  
a fit estimate for the artificial inflation in observed performance caused by fitting a 121  
model and evaluating it with the same data, and to find a good balance between bias 122  
caused by too restrictive a model and excessive variance caused by too rich a model 123  
(Hastie *et al.*, 2001). Model parsimony is not a motivating goal in its own right, 124  
but is a means to reduce unnecessary sampling error caused by having to estimate 125

too many parameters relative to  $n$ . Thus, especially for large  $n$ , sensitivity is likely to be treated as more important than specificity. If parsimonious interpretation is of interest in its own right, another criterion such as BIC, described in the next section, might be more appropriate.

The Deviance Information Criterion used in Bayesian analyses (Spiegelhalter *et al.*, 2002; Gibson *et al.*, 2018) is beyond the scope of this paper because it cannot be expressed as a value of  $A_n$  in Expression (1). However, it has some relationship to AIC and has an analogous purpose (Claeskens and Hjort, 2008; Ando, 2013).

Other ICs are named after AIC but do not derive from the same theoretical framework, except that they share the form (1). For example, some researchers (Andrews and Currim, 2003; Fonseca and Cardoso, 2007; Yang and Yang, 2007) have suggested using  $A_n = 3$  in expression (1) instead of 2. The use of  $A_n = 3$  is sometimes called “AIC3.” There is no statistical theory to motivate AIC3, such as minimizing KL divergence or any other theoretical construct, but on an *ad hoc* basis it has fairly good simulation performance in some settings, being stricter than AIC but not as strict as BIC. Also, the CAIC, the “corrected” or “consistent” AIC proposed by Bozdogan (1987), uses  $A_n = \ln(n) + 1$ . (It should not be confused with the  $AIC_c$  discussed above.) This penalty tends to result in a more parsimonious model and more underfitting than AIC or BIC, and it is therefore not very similar to AIC. This value of  $A_n$  was chosen somewhat arbitrarily as an example of an  $A_n$  that would provide model selection consistency, a property described below in the section for BIC. However, any  $A_n$  proportional to  $\ln(n)$  provides model selection consistency, so CAIC has no real advantage over the better-known and better-studied BIC (see below), which also has this property.

### **Schwarz’s Bayesian Information Criterion (BIC)**

In Bayesian model selection, a prior probability is set for each model  $M_i$ , and prior distributions (often uninformative priors for simplicity) are also set for the nonzero coefficients in each model. If we assume that one and only one model, along with its associated priors, is true, we can use Bayes’ theorem to find the posterior probability of each model given the data. Let  $\Pr(M_i)$  be the prior probability set by the researcher, and let  $\Pr(\mathbf{y}|M_i)$  be the probability density of the data given

$M_i$ , calculated as the expected value of the likelihood function of  $\mathbf{y}$  given the model and parameters, over the prior distribution of the parameters. According to Bayes' theorem, the posterior probability  $\Pr(M_i|\mathbf{y})$  of a model is proportional to  $\Pr(M_i)\Pr(\mathbf{y}|M_i)$ . The degree to which the data support  $M_i$  over another model  $M_j$  is given by the ratio of the posterior odds to the prior odds:

$$\frac{\frac{\Pr(M_i|\mathbf{Y})}{\Pr(M_j|\mathbf{Y})}}{\frac{\Pr(M_i)}{\Pr(M_j)}}.$$

If we assume equal prior probabilities for each model, this simplifies to the “Bayes factor” (see Kass and Raftery, 1995):

$$B_{ij} = \frac{\Pr(M_i|\mathbf{y})}{\Pr(M_j|\mathbf{y})}$$

so that the model with the highest Bayes factor also has the higher posterior probability. Schwarz (1978) and Kass and Wasserman (1995) showed that, for many kinds of models,  $B_{ij}$  can be roughly approximated by  $\exp(-\frac{1}{2}BIC_i + \frac{1}{2}BIC_j)$ , where BIC equals Expression (1) with  $A_n = \ln(n)$ , especially if a certain “unit information” prior is used for the coefficients. The use of Bayes factors has been argued to be more interpretable than that of significance tests in some practical settings (Raftery, 1996; Goodman, 2008; Beard *et al.*, 2016) although with some caveats (see Gigerenzer and Marewski, 2015; Murtaugh, 2014). Thus the model with the highest posterior probability is likely to be the one with lowest BIC. BIC is described further in Raftery (1995) and Wasserman (2000), but critiqued by Gelman and Rubin (1995) and Weakliem (1999), who find it to be an oversimplification of Bayesian methods. BIC can also be called the Schwarz criterion.

BIC is sometimes preferred over AIC because BIC is “consistent” (e.g., Nylund *et al.*, 2007). Assuming that a fixed number of models are available and that one of them is the true model, a consistent selector is one that selects the true model with probability approaching 100% as  $n \rightarrow \infty$  (see Rao and Wu, 1989; Zhang, 1993; Shao, 1997; Yang, 2005; Claeskens and Hjort, 2008). The existence of a true model here is not as unrealistically dogmatic as it sounds (Burnham and Anderson, 2004; Kuha, 2004). Rather, the *true* model can be defined as the smallest adequate model, that is, the single model that minimizes KL divergence, or the smallest such



model if there is more than one (Claeskens and Hjort, 2008). There may be more  
than one such model because if a given model has a given KL divergence from the  
truth, any more general model containing it will have no greater distance from the  
truth. This is because there is some set of parameters for which the larger model  
becomes the model nested within it. However, the theoretical properties of BIC  
are better in situations in which a model with a finite number of parameters can  
be treated as “true” (Shao, 1997).

AIC is not consistent because it has a non-vanishing chance of choosing an  
unnecessarily complex model as  $n$  becomes large. The unnecessarily complex model  
would still closely approximate the true distribution but would use more parameters  
than necessary to do so. However, selection consistency involves some performance  
tradeoffs when  $n$  is modest, specifically, an elevated risk of poor performance caused  
by underfitting (see Shibata, 1986; Shao, 1997; Pötscher, 1991; Vrieze, 2012). In  
general, the strengths of AIC and BIC cannot be combined by any single choice  
of  $A_n$  (Leeb, 2008; Yang, 2005). However, in some cases it is possible to construct  
a more complicated model selection approach that uses aspects of both (see Ding  
*et al.*, 2018).

**Criteria Related to BIC.** Sclove (1987) suggested a sample-size-adjusted  
BIC, variously abbreviated as ABIC, SABIC, or BIC\*, based on the work of Rissanen  
(1978) and Boeke and Buss (1981). It uses  $A_n = \ln((n + 2)/24)$  instead of  
 $A_n = \ln(n)$ . This penalty will be much lighter than that of BIC, and may be lighter  
or heavier than that of AIC, depending on  $n$ . The unusual expression for  $A_n$  comes  
from Rissanen’s work on model selection for autoregressive time series models from  
a minimum description length perspective (see Stine, 2004). It is not clear whether  
or not the same adjustment is still theoretically appropriate in different contexts,  
but in practice it is sometimes used in latent class modeling and seems to work  
fairly well (see Nylund *et al.*, 2007; Tein *et al.*, 2013).

## 2 Information Criteria in Simple Cases

The above shows that AIC and BIC differ in theoretical basis. They also often  
disagree in practice, generally with AIC indicating models with more parameters  
and BIC with less. This has led many researchers to question whether and when a

particular value of the “magic number”  $A_n$  (Bozdogan, 1987) can be chosen as most  
appropriate. Two special cases – comparing equally sized models and comparing  
nested models – each provide some insight into this question.

First, *when comparing different models of the same size* (i.e., number of param-  
eters to be estimated), all ICs of the form (1) will always agree on which model is  
best. For example, in regression variable subset selection, suppose two models each  
use five covariates. In this case, any IC will select whichever model has the highest  
likelihood (the best fit to the observed sample) after estimating the parameters.  
This is because only the first term in Expression (1) will differ across the candi-  
date models, so  $A_n$  does not matter. Thus, although the ICs differ in theoretical  
framework, they only disagree when they make different tradeoffs between fit and  
model size.

Second, *for comparing a nested pair of models, different ICs act like different*  
 *$\alpha$  levels on a likelihood ratio test (LRT)*. For comparing models of different sizes,  
when one model is a restricted case of the other, the larger model will typically offer  
better fit to the observed data at the cost of needing to estimate more parameters.  
The ICs will differ only in how they make this bias-variance tradeoff (Lin and  
Dayton, 1997; Sclove, 1987). Thus, an IC will act like a hypothesis test with a  
particular  $\alpha$  level (Söderström, 1977; Teräsvirta and Mellin, 1986; Pötscher, 1991;  
Claeskens and Hjort, 2008; Foster and George, 1994; Stoica *et al.*, 2004; van der  
Hoeven, 2005; Vrieze, 2012; Murtaugh, 2014).

Suppose a researcher will choose whichever of  $M_0$  and  $M_1$  has the better (lower)  
value of an IC of the form (1). This means that  $M_1$  will be chosen if and only if  
 $-2\ell_1 + A_n p_1 < -2\ell_0 + A_n p_0$ , where  $\ell_1$  and  $\ell_0$  are the fitted maximized log-likelihoods  
for each model. Although the comparison of models is interpreted differently in the  
theoretical frameworks used to justify AIC and BIC (Aho *et al.*, 2014; Kuha, 2004),  
algebraically this comparison is the same as a LRT (Söderström, 1977; Stoica *et al.*,  
2004; Pötscher, 1991). That is,  $M_0$  is rejected if and only if

$$-2(\ell_0 - \ell_1) > A_n(p_1 - p_0). \quad (2)$$

The left-hand side is the LRT test statistic (since a logarithm of a ratio of quantities  
is the difference in the logarithms of the quantities). Thus, in the case of nested

models an IC comparison is mathematically an LRT with a different interpretation. 232  
The  $\alpha$  level is specified indirectly through the critical value  $A_n$ ; it is the proportion 233  
of the null hypothesis distribution of the LRT statistic that is less than  $A_n$ . 234

For many kinds of models, the asymptotic null-hypothesis distribution of  $-2(\ell_0 - \ell_1)$  is asymptotically  $\chi^2$  with degrees of freedom ( $df$ ) equal to  $p_1 - p_0$ . Consulting a  $\chi^2$  table and assuming  $p_1 - p_0 = 1$ , AIC ( $A_n = 2$ ) becomes equivalent to 235  
a LRT test at an  $\alpha$  level of about .16 (i.e., the probability of a  $\chi^2_1$  deviate being 236  
greater than 2). In the same situation, BIC (with  $A_n = \ln(n)$ ) has an  $\alpha$  level that 237  
depends on  $n$ . If  $n = 10$  then  $A_n = \ln(n) = 2.30$  so  $\alpha = .13$ . If  $n = 100$  then 238  
 $A_n = 4.60$  so  $\alpha = .032$ . If  $n = 1000$  then  $A_n = 6.91$  so  $\alpha = .0086$ , and so on. Thus 239  
when  $p_1 - p_0 = 1$ , significance testing at the customary level of  $\alpha = .05$  is often 240  
an intermediate choice between AIC and BIC, corresponding to  $A_n = 1.96^2 \approx 4$ . 241  
However, as  $p_1 - p_0$  becomes larger, all ICs become more conservative, in order to 242  
avoid adding many unnecessary parameters unless they are needed. Table 2 shows 243  
different effective  $\alpha$  values for two values of  $p_1 - p_0$ , obtained using the R (R De- 244  
velopment Core Team, 2010) code `1-pchisq(q=An*df,df=df,lower.tail=TRUE)` 245  
where `An` is the  $A_n$  value and `df` is  $p_1 - p_0$ . AIC<sub>C</sub> is not shown in the table because 246  
its penalty weight depends both on  $p_0$  and on  $p_1$  in a slightly more complicated 247  
way, but will behave similarly to AIC for large  $n$  and modest  $p_0$ . 248  
249  
250

The property of selection consistency can be intuitively understood from this 251  
perspective. For AIC, as for hypothesis tests, the power of a test increases with 252  
 $n$ . Thus, rejecting any given false null hypothesis is practically guaranteed for 253  
sufficiently large  $n$  even if the effect size is tiny. However, the Type I error rate 254  
is constant and never approaches zero. On the other hand, BIC becomes a more 255  
stringent test (has a decreasing Type I error rate) as  $n$  increases. The power 256  
increases more slowly (i.e., the Type II error rate decreases more slowly) than for 257  
AIC or for fixed- $\alpha$  hypothesis tests because the test is becoming more stringent, 258  
but now the Type I error rate is also decreasing. Thus, nonzero but practically 259  
negligible departures from a model are less likely to lead to rejecting the model 260  
for BIC than for AIC (Raftery, 1995). Fortunately, even for BIC, the decrease in 261  
 $\alpha$  as  $n$  increases is slow; thus power still increases as  $n$  increases, although more 262  
slowly than it would for AIC. Thus, for BIC, both the Type I and Type II error 263

Table 2: Alpha Levels Represented By Common Information Criteria

| n                         | AIC     | ABIC     | BIC      | CAIC     |
|---------------------------|---------|----------|----------|----------|
| Assuming $p_1 - p_0 = 1$  |         |          |          |          |
| 10                        | 0.15730 | 1.00000  | 0.12916  | 0.06917  |
| 50                        | 0.15730 | 0.37923  | 0.04794  | 0.02667  |
| 100                       | 0.15730 | 0.22902  | 0.03188  | 0.01791  |
| 500                       | 0.15730 | 0.08121  | 0.01267  | 0.00723  |
| 1000                      | 0.15730 | 0.05339  | 0.00858  | 0.00492  |
| 5000                      | 0.15730 | 0.02085  | 0.00352  | 0.00204  |
| 10000                     | 0.15730 | 0.01404  | 0.00241  | 0.00140  |
| 100000                    | 0.15730 | 0.00389  | 0.00069  | 0.00040  |
| Assuming $p_1 - p_0 = 10$ |         |          |          |          |
| 10                        | 0.02925 | 1.00000  | 0.01065  | 0.00027  |
| 50                        | 0.02925 | 0.65501  | 0.00002  | < 0.0001 |
| 100                       | 0.02925 | 0.15265  | < 0.0001 | < 0.0001 |
| 500                       | 0.02925 | 0.00074  | < 0.0001 | < 0.0001 |
| 1000                      | 0.02925 | 0.00005  | < 0.0001 | < 0.0001 |
| 5000                      | 0.02925 | < 0.0001 | < 0.0001 | < 0.0001 |
| 10000                     | 0.02925 | < 0.0001 | < 0.0001 | < 0.0001 |
| 100000                    | 0.02925 | < 0.0001 | < 0.0001 | < 0.0001 |

rates decline slowly as  $n$  increases, while for AIC (and for classical significance testing) the Type II error rate declines more quickly but the Type I error rate does not decline at all. This is intuitively why a criterion with constant  $A_n$  cannot be asymptotically consistent even though it may be more powerful for a given  $n$  (see Claeskens and Hjort, 2008; Yang, 2005; Kieseppä, 2003).

Nylund *et al.* (2007) seem to interpret the lack of selection consistency as a flaw in AIC (Nylund *et al.*, 2007, p. 556). However, the real situation is more complicated; AIC is not a defective BIC, nor *vice versa* (see Kieseppä, 2003; Shibata, 1981, 1986; Pötscher, 1991; Vrieze, 2012). Likewise, the other ICs mentioned here are neither right nor wrong, but are simply choices (perhaps thoughtful and perhaps arbitrary, but still technically valid choices). Since choosing  $A_n$  for a model comparison is closely related to choosing an  $\alpha$  level for a significance test, the universally “best” IC cannot be defined any more than the “best”  $\alpha$ ; there will always be a tradeoff. Thus, debates about whether AIC is generally superior to BIC or *vice versa*, will be fruitless.

*For non-nested models of different sizes*, neither of the above simple cases hold; furthermore, these complex cases are often those in which ICs are most important

because a LRT cannot be performed. However, it remains the case that  $A_n$  has a  
powerful effect on the tradeoff between the likelihood term and the penalty on the  
number of parameters, hence the tradeoff between good fit to the observed data  
and parsimony.

Almost by definition, there is no universal best way to decide how to make a  
tradeoff. Sometimes the relative importance of sensitivity or specificity depends on  
the decisions to be made based on model predictions. For example, in theoretical  
research Type I error is considered to be more serious because it is a false statement  
rather than simply a failure to reject a null hypothesis. However, in some envi-  
ronmental or epidemiological decision-making contexts, the decision corresponding  
to Type II error might be much more harmful to public health than that which  
would correspond to a Type I error, requiring increased attention to uncertainty  
about the adequacy of null hypothesis (Peterman, 1990; Andorno, 2004). In this  
way, one could characterize the comparison of models by analogy to a medical di-  
agnostic test (see, e.g., Altman and Bland, 1994), replacing “Type I error” with  
“false positive” and “Type II error” with “false negative.” AIC and BIC use the  
same data but apply different cutoffs for whether to “diagnose” the smaller model  
as being inadequate. AIC is more sensitive (lower false-negative rate), but BIC is  
more specific (lower false-positive rate). The utility of each cutoff is determined  
by the consequences of a false positive or false negative and by one’s beliefs about  
the base rates of positives and negatives. Thus, AIC and BIC could be seen as  
representing different sets of prior beliefs in a Bayesian sense (see Burnham and  
Anderson, 2004; Kadane and Lazar, 2004) or, at least, different judgments about  
the importance of parsimony. For example, although AIC has favorable theoretical  
properties for choosing the number of parameters needed to approximate the shape  
of a nonparametric growth curve in general (Shao, 1997), in a particular application  
with such data Dziak *et al.* (2015) argued that BIC would give more interpretable  
results. They argued this because the curves in that context were believed likely  
to have a smooth and simple shape, as they represented averaged trajectories of  
an intensively measured variable on individuals with diverse individual experiences  
and because deviations from the trajectory could be modeled using other aspects  
of the model.

As a caveat, if a researcher wishes to consider practical consequences of decisions based on model choices directly, it may be much more satisfactory to explicitly use Bayesian decision theory rather than simply choosing a value of Expression  $A_n$  in (1) (see, e.g., Claxton *et al.*, 2000; Gelman and Rubin, 1995). Also, in practice it is often difficult to determine the  $\alpha$  value that a particular criterion really represents, for two reasons. First, even for regular situations in which a LRT is known to work well, the  $\chi^2$  distribution for the test statistic is asymptotic and will not apply well to small  $n$ . Second, in some situations the rationale for using an IC is, ironically, the failure of the assumptions needed for a LRT. That is, the test emulated by the IC will itself not be valid at its nominal  $\alpha$  level anyway. Therefore, although the comparison of  $A_n$  to an  $\alpha$  level is helpful for getting a sense of the similarities and differences among the ICs, simulations are required to describe exactly how they behave. In the section below we review simulation results from a common application of ICs, namely the selection of the number of latent classes (empirically derived clusters) in a dataset.

### 3 The Special Case of Latent Class Analysis

A common use of ICs is in selecting the number of components for a latent class analysis (LCA). LCA is a kind of finite mixture model (essentially, a model-based cluster analysis; McLachlan and Peel, 2000; Lazarsfeld and Henry, 1968; Collins and Lanza, 2010). LCA assumes that the population is a “mixture” of multiple classes of a categorical latent variable. Each class has different parameters that define the distributions of observed items, and the goal is to account for the relationships among items by defining classes appropriately. In this section we consider LCA as described in Collins and Lanza (2010), although ICs are also used for more complex mixture models and clustering applications (e.g., Wang *et al.*, 2012; Ye *et al.*, 2015). LCA is very similar to cluster analysis, but is based on maximizing an explicitly stated likelihood function rather than focusing on a heuristic computational algorithm like  $k$ -means. Also, some authors use the term LCA only when the observed variables are also categorical, and use the term “latent profile analysis” for numerical observed variables, but we ignore this distinction here. LCA is also closely related to latent transition (LTA) models (see Collins and Lanza,

2010), an application of hidden Markov models (see, e.g., Eddy, 2004) that allows changes in latent class membership, conceptualized as transitions in an unobserved Markov chain. LCA models are sometimes used in combination with other models, such as in predicting class membership from genotypic or demographic variables, or predicting medical or behavioral phenotypes from class membership (e.g., Lubke *et al.*, 2012; Dziak *et al.*, 2016; Bray *et al.*, 2018). To fit an LCA model or any of its cousins, an algorithm such as EM (Dempster *et al.*, 1977; McLachlan and Peel, 2000; Gupta and Chen, 2010) is often used to alternatively estimate class-specific parameters and predict subjects' class membership given those parameters. The user must specify the number of classes in a model, but the true number of classes is generally unknown. (Nylund *et al.*, 2007; Tein *et al.*, 2013). Sometimes one might have a strong theoretical reason to specify the number of classes, but often this must be done using data-driven model selection.

A naïve approach would be to use likelihood ratio (LR) or deviance ( $G^2$ ) tests sequentially to choose the number of classes and to conclude that the  $k$ -class model is large enough if and only if the  $(k+1)$ -class model does not fit the data significantly better. The selected number of classes would be the smallest  $k$  that is not rejected when compared to the  $(k + 1)$ -class model. However, the assumptions for the supposed asymptotic  $\chi^2$  distribution in a LRT are not met in the setting of LCA, so that the  $p$ -values from those tests are not valid (see Lin and Dayton, 1997; McLachlan and Peel, 2000). The reasons for this are based on the fact that  $H_0$  here is not nested in a regular way within  $H_1$ , since a  $k$ -class model is obtained from a  $(k + 1)$ -class model either by constraining any one of the class sizes to a boundary value of zero or by setting the class-specific item-response probabilities equal between any two classes. That is, an meaningful  $k$ -class model is not obtained simply by setting a parameter to zero in a  $(k + 1)$  class model in the way that, for example, a more parsimonious regression model is obtained by constraining certain coefficients in a richer model to zero. Ironically, the lack of regular nesting structure that makes it impossible to decide on the number of classes with an LRT has also been shown to invalidate the mathematical approximations used in the AIC and BIC derivations in the same way (McLachlan and Peel, 2000, pp. 202-212). Nonetheless, ICs are widely used in LCA and other mixture models. This is

partly due to their ease of use, even without a firm theoretical basis. Fortunately, 376  
there is at least an asymptotic theoretical result showing that, when the true model 377  
is well-identified, BIC (and hence also AIC and ABIC) will have a probability of 378  
underestimating the true number of classes that approaches 0 as sample size tends 379  
to infinity (Leroux, 1992; McLachlan and Peel, 2000, p. 209). 380

Lin and Dayton (1997) did an early simulation study comparing the performance 381  
of AIC, BIC, and CAIC for choosing which assumptions to make in constructing 382  
constrained LCA models, a model selection task which is somewhat but not fully 383  
analogous to choosing the number of classes. When a very simple model was used 384  
as the true model, BIC and CAIC were more likely to choose the true model than 385  
AIC, which tended to choose an unnecessarily complicated one. When a more 386  
complex model was used to generate the data and measurement quality was poor, 387  
AIC was more likely to choose the true model than BIC or CAIC, which were likely 388  
to choose an overly simplistic one. They explained that this was very intuitive given 389  
the differing degrees of emphasis on parsimony. Interpreting these results, Dayton 390  
(1998) suggested that AIC tended to be a better choice in LCA than BIC, but 391  
recommended computing and comparing both. 392

Other simulations have explored the ability of the ICs to determine the correct 393  
number of classes. In Dias (2006), AIC had the lowest rate of underfitting but 394  
often overfit, while BIC and CAIC practically never overfit but often underfit. 395  
AIC3 was in between and did well in general. The danger of underfitting increased 396  
when the classes did not have very different response profiles and were therefore 397  
easy to mistakenly lump together; in these cases BIC and CAIC almost always 398  
underfit. Yang (2006) reported that ABIC performed better in general than AIC 399  
(whose model selection accuracy never got to 100% regardless of  $n$ ) or BIC or 400  
CAIC (which underfit too often and required large  $n$  to be accurate). Fonseca and 401  
Cardoso (2007) similarly suggested AIC3 as the preferred selection criterion for 402  
categorical LCA models. 403

Yang and Yang (2007) compared AIC, BIC, AIC3, ABIC and CAIC. When the 404  
true number of classes was large and  $n$  was small, CAIC and BIC seriously under- 405  
fit, but AIC3 and ABIC performed better. Nylund *et al.* (2007) presented various 406  
simulations on the performance of various ICs and tests for selecting the number 407



of classes in LCA, as well as factor mixture models and growth mixture models. 408  
Overall, in their simulations, BIC performed much better than AIC, which tended 409  
to overfit, or CAIC, which tended to underfit (Nylund *et al.*, 2007, p. 559). How- 410  
ever, this does not mean that BIC was the best in every situation. In most of the 411  
scenarios considered by Nylund *et al.* (2007), BIC and CAIC almost always selected 412  
the correct model size, while AIC had a much smaller accuracy in these scenarios 413  
because of a tendency to overfit. In those scenarios,  $n$  was large enough so that 414  
the lower sensitivity of BIC was not a problem. However, in a more challenging 415  
scenario with a small sample and unequally sized classes, (Nylund *et al.*, 2007, p. 416  
557), BIC essentially never chose the larger correct model and it usually chose one 417  
that was much too small. Thus, as Lin and Dayton (1997) found, BIC may select 418  
too few classes when the true population structure is complex but subtle (for exam- 419  
ple, a small but nonzero difference between the parameters of a pair of classes) and 420  
 $n$  is small. Wu (2009) compared the performance of AIC, BIC, ABIC, CAIC, naïve 421  
tests, and the bootstrap LRT in hundreds of simulated scenarios. Performance was 422  
heavily dependent on the scenario, but the method that worked adequately in the 423  
greatest variety of situations was the bootstrap LRT, followed by ABIC and classic 424  
BIC. Wu (2009) argued that BIC seemed to outperform ABIC in the most optimal 425  
situations because of its parsimony, but that ABIC seemed to do better in situa- 426  
tions with smaller  $n$  or more unequal class sizes. Dziak *et al.* (2014) also concluded 427  
that BIC could seriously underfit relative to AIC for small sample sizes or other 428  
challenging situations. In latent profile analysis, Tein *et al.* (2013) found that BIC 429  
and ABIC did well for large sample sizes and easily distinguishable classes, but AIC 430  
chose too many classes, and no method performed well for especially challenging 431  
scenarios. In a more distantly related mixture modeling framework involving mod- 432  
eling evolutionary rates at different genomic sites, Kalyaanamoorthy *et al.* (2017) 433  
found that AIC, AIC<sub>c</sub>, and BIC worked well but that BIC worked best. 434

Despite all these findings, is not possible to say which IC is universally best, 435  
even in the idealized world of simulations. Rather, the true parameter values and 436  
 $n$  used when generating simulated data determine the relative performance of the 437  
ICs. For small  $n$ , the most likely error in a simulation is underfitting, so the criteria 438  
with lower underfitting rates, such as AIC, often seem better. For larger  $n$ , the 439

most likely error is overfitting, so more parsimonious criteria, such as BIC, often  
seem better. Unfortunately, the point at which the  $n$  becomes “large” depends on  
numerous aspects of the situation. Furthermore, all of these findings have limited  
usefulness in real data, where the truth is unknown. It may be more helpful to  
think about which aspects of performance (e.g., sensitivity or specificity) are most  
important in a given situation.

If the goal of having a sufficiently rich model to describe the heterogeneity in the  
population is more important than parsimony, or if some classes are expected to be  
small or similar to other classes but distinguishing among them is still considered  
important for theoretical reasons, then perhaps AIC, AIC3 or ABIC should be  
used instead of BIC or CAIC. If obtaining a few large and distinctly interpretable  
classes is more important, then BIC is more appropriate. Sometimes, the AIC-  
favored model might be so large as to be difficult to use or understand. In these  
cases, the BIC-favored model is clearly the better practical choice. For example, in  
Chan *et al.* (2007) BIC favored a mixture model with 5 classes, and AIC favored at  
least 10; the authors felt that a 10-class model would be too hard to interpret. In  
fact, it may be necessary for theoretical or practical reasons to choose a number of  
classes even smaller than that suggested by BIC. This is because it is important to  
choose the number of classes based on their theoretical interpretability, as well as  
by excluding any models with so many classes that they lead to a failure to converge  
to a clear maximum-likelihood solution (see Collins and Lanza, 2010; Pohle *et al.*,  
2017; Bray and Dziak, 2018).

An alternative to ICs in latent class analysis and cluster analysis is the use  
of a bootstrap test (see McLachlan and Peel, 2000). Unlike the naïve NRT, Ny-  
lund *et al.* (2007) showed empirically that the bootstrap LRT with a given  $\alpha$  level  
does generally provide a Type I error rate at or below that specified level. Both  
Nylund *et al.* (2007) and Wu (2009) found that this bootstrap test seemed to per-  
form somewhat better than the ICs in various situations. The bootstrap LRT is  
beyond the scope of this paper, as are more computationally intensive versions of  
AIC and BIC, involving bootstrapping, cross-validation, or posterior simulation  
(see McLachlan and Peel, 2000, pp. 204-212). Also beyond the scope of this pa-  
per are mixture-specific selection criteria such as the normalized entropy criterion

(Biernacki *et al.*, 1999) or integrated completed likelihood (Biernacki and Celeux, 2000; Rau and Maugis, 2018). However, the basic ideas in this article will still be helpful in interpreting the implications of some of the other selection methods. For example, like any test or criterion, the bootstrap LRT still requires the choice of a tradeoff between sensitivity and specificity (i.e., by selecting an  $\alpha$  level).

## 4 Discussion

If BIC indicates that a model is too small, it may well be too small (or else fit poorly for some other reason). If AIC indicates that a model is too large, it may well be too large for the data to warrant. Beyond this, theory and judgment are needed. If BIC selects the largest and most general model considered, it is worth thinking about whether to expand the space of models considered (since an even more general model might fit even better), and similarly if AIC chooses the most parsimonious.

AIC and BIC each have distinct theoretical advantages. However, a researcher may judge that there may be a practical advantage to one or the other in some situations. For example, as mentioned earlier, in choosing the number of classes in a mixture model, the true number of classes required to satisfy all model assumptions is sometimes quite large, too large to be of practical use or even to allow coefficients to be reliably estimated. In that case, BIC would be a better choice than AIC. Additionally, in practice, one may wish to rely on substantive theory or parsimony of interpretation in choosing a relatively simple model. In such cases, the researcher may decide that even the BIC may have indicated a model that is too complex in a practical sense, and may choose to select a smaller model that is more theoretically meaningful or practically interpretable instead (Pohle *et al.*, 2017; Bray and Dziak, 2018). This does not mean that BIC overfit. Rather, in these situations the model desired is sometimes not the literally true model but simply the most useful model, a concept which cannot be identified using fit statistics alone but requires subjective judgment. Depending on the situation, the number of classes in a mixture model may either be interpreted a true quantity needing to be objectively estimated, or else as a level of approximation to be chosen for convenience, like the scale of a map. Still, in either case the question of which patterns or features are generalizable

beyond the given sample remains relevant (c.f. Li and Marron, 2005). 503

A larger question is whether to use ICs at all. If ICs indeed reduce to LRTs 504  
in simple cases, one might wonder why ICs are needed at all, and why researchers 505  
cannot simply do LRTs. A possible answer is flexibility. Both AIC and BIC can be 506  
used to concurrently compare many models, not just a pair at a time, or to weight 507  
the estimates obtained from different models for a common quantity of interest. 508  
These weighting approaches use either AIC or BIC but not both, because AIC and 509  
BIC are essentially treated as different Bayesian priors. While currently we know 510  
of no mathematical theoretical framework for explicitly combining both AIC and 511  
BIC into a single weighting scheme, a sensitivity analysis could be performed by 512  
comparing the results from both. AIC and BIC can also be used to choose a few 513  
well-fitting models, rather than selecting a single model from among many and 514  
assuming it to be the truth (Kuha, 2004). Researchers have also proposed bench- 515  
marks for judging whether the size of a difference in AIC or BIC between models 516  
is practically significant (see Burnham and Anderson, 2004; Raftery, 1995; Mur- 517  
taugh, 2014); for example, an AIC or BIC difference between two models of less 518  
than 2 provides little evidence for one over the other; an AIC or BIC difference of 519  
10 or more is strong evidence. These principles should not be used as rigid cutoffs 520  
Murtaugh (2014), but as input to decision making and interpretation. Kadane and 521  
Lazar Kadane and Lazar (2004) suggested that ICs might be used to “deselect” 522  
very poor models (p. 279), leaving a few good ones for further study, rather than 523  
indicating a single best model. One could use the ICs to suggest a range of model 524  
sizes to consider for future study; for example, in some cases one might use the 525  
BIC- preferred model as a minimum size and the AIC-preferred model as a maxi- 526  
mum. AIC and BIC can also both be used for model averaging, that is, estimating 527  
quantities of interest by combining more than one model weighted by their plau- 528  
sibility (see Posada and Crandall, 2001; Posada and Buckley, 2004; Claeskens and 529  
Hjort, 2008; Johnson and Omland, 2004; Gelman and Rubin, 1995; Hoeting *et al.*, 530  
1999; Burnham and Anderson, 2004). Despite these many worthwhile options, it 531  
is still important to remember an automatic and uncritical use of an IC is no more 532  
insightful than an automatic and uncritical use of a  $p$ -value. 533

Lastly, both AIC and BIC were developed in situations in which  $n$  was assumed 534

to be much larger than  $p$ . None of the ICs discussed here were specifically developed 535  
for situations such as those found in many genome-wide association studies pre- 536  
dicting disease outcomes, in which the number of participants ( $n$ ) is often smaller 537  
than the number of potential genes ( $p$ ), even when  $n$  is in the tens of thousands. 538  
The ICs can still be practically useful in this setting (e.g., Cross-Disorder Group 539  
of the Psychiatric Genomics Consortium, 2013). However, sometimes they might 540  
need to be adapted (see, e.g., Chen and Chen, 2008; Pan *et al.*, 2016; Mestres *et al.*, 541  
2018). More research in this area would be worthwhile. 542

## Acknowledgements

The authors thank Linda M. Collins for very valuable suggestions and insights which helped in the development of this paper. We also thank Michael Cleveland for his careful review and recommendations on an earlier version of this paper. John Dziak thanks Frank Sabach for encouragement in the early stages. Amanda Applegate is also thanked for her editorial assistance. Lars Jermiin thanks the University College Dublin for its generous hospitality.

A previous version of this report has been disseminated as Methodology Center Technical Report 12-119, June 27, 2012, and as a preprint at <https://peerj.com/preprints/1103/>. The earlier version of the paper contains simulations to illustrate the points made. Simulation code is available at <http://www.runmycode.org/companion/view/1306> and results at <https://methodology.psu.edu/media/techreports/12-119.pdf>.

## Funding

This research was supported by NIH grant P50 DA039838 from the National Institute on Drug Abuse. The content is solely the responsibility of the authors and does not necessarily represent the official views of the National Institute on Drug Abuse or the National Institutes of Health.

## References

- Aho, K. A., Derryberry, D., and Peterson, T. (2014). Model selection for ecologists: the worldviews of AIC and BIC. *Ecology*, **95** **3**, 631–6.
- Akaike, H. (1973). Information theory and an extension of the maximum likelihood principle. In B. N. Petrov and F. Csaki, editors, *Second International Symposium on Information Theory*, pages 267–281. Akademiai Kiado, Budapest, Hungary.
- Altman, D. G. and Bland, J. M. (1994). Diagnostic tests 1: sensitivity and specificity. *British Medical Journal*, **308**, 1552.
- Ando, T. (2013). Predictive Bayesian model selection. *American Journal of Mathematical and Management Sciences*, **31**, 13–38.
- Andorno, R. (2004). The precautionary principle: A new legal standard for a technological age. *Journal of International Biotechnology Law*, **1**, 11–19.
- Andrews, R. L. and Currim, I. S. (2003). A comparison of segment retention criteria for finite mixture logit models. *Journal of Marketing Research*, **40**, 235–243.
- Atkinson, A. C. (1980). A note on the generalized information criterion for choice of a model. *Biometrika*, **67**, 413–418.
- Beard, E., Dienes, Z., Muirhead, C., and West, R. (2016). Using Bayes factors for testing hypotheses about intervention effectiveness in addictions research. *Addiction*, **111**, 2230–2247.
- Biernacki, C. and Celeux, G. (2000). Assessing a mixture model for clustering with the integrated completed likelihood. *IEEE Trans. Pattern Anal. Mach. Intell.*, **22**, 719–725.
- Biernacki, C., Celeux, G., and Govaert, G. (1999). An improvement of the NEC criterion for assessing the number of clusters in a mixture model. *Pattern Recognition Letters*, **20**, 267–272.
- Boeke, D. E. and Buss, H. H. (1981). Order estimation of autoregressive models. In *Proceedings of the 4th Aachen colloquium: Theory and application of signal processing*, pages 126–130.

- Bozdogan, H. (1987). Model selection and Akaike's Information Criterion (AIC): The general theory and its analytical extensions. *Psychometrika*, **52**, 345–370.
- Bray, B. C. and Dziak, J. J. (2018). Commentary on latent class, latent profile, and latent transition analysis for characterizing individual differences in learning. *Learning and Individual Differences*.
- Bray, B. C., Dziak, J. J., Patrick, M. E., and Lanza, S. T. (2018). Inverse propensity score weighting with a latent class exposure: Estimating the causal effect of reported reasons for alcohol use on problem alcohol use 15 years later. *Prevention Science*.
- Burnham, K. P. and Anderson, D. R. (2002). *Model selection and multimodel inference: A practical information-theoretic approach*. Springer-Verlag, New York, NY, 2nd edition.
- Burnham, K. P. and Anderson, D. R. (2004). Multimodel inference: Understanding AIC and BIC in model selection. *Sociological Methods and Research*, **33**, 261–304.
- Chan, W.-H., Leu, Y.-C., and Chen, C.-M. (2007). Exploring group-wise conceptual deficiencies of fractions for fifth and sixth graders in Taiwan. *The Journal of Experimental Education*, **76**, 26–57.
- Chen, J. and Chen, Z. (2008). Extended bayesian information criterion for model selection with large model spaces. *Biometrika*, **95**, 759–771.
- Claeskens, G. and Hjort, N. L. (2008). *Model selection and model averaging*. Cambridge, New York, NY.
- Claxton, K., Lacey, L. F., and Walker, S. G. (2000). Selecting treatments: a decision theoretic approach. *Journal of the Royal Statistical Society, A*, **163**, 211–225.
- Collins, L. M. and Lanza, S. T. (2010). *Latent class and latent transition analysis for the social, behavioral, and health sciences*. Wiley, Hoboken, NJ.

- Cross-Disorder Group of the Psychiatric Genomics Consortium (2013). Identification of risk loci with shared effects on five major psychiatric disorders: a genome-wide analysis. *The Lancet*, **381**(9875), 1371 – 1379.
- Darriba, D., Taboada, G. L., Doallo, R., and Posada, D. (2012). jModelTest 2: More models, new heuristics and parallel computing. *Nature Methods*, **9**, 772.
- Dayton, C. M. (1998). *Latent class scaling analysis*. Sage, Thousand Oaks, CA.
- Dempster, A. P., Laird, N. M., and Rubin, D. B. (1977). Maximum likelihood from incomplete data via the EM algorithm. *Journal of the Royal Statistical Society, B*, **39**, 1–38.
- Dias, J. G. (2006). Model selection for the binary latent class model: A Monte Carlo simulation. In V. Batagelj, H.-H. Bock, A. Ferligoj, and A. Žiberna, editors, *Data Science and Classification*, pages 91–99. Springer-Verlag, Berlin, Germany.
- Ding, J., Tarokh, V., and Yang, Y. (2018). Bridging AIC and BIC: A new criterion for autoregression. *IEEE Transactions on Information Theory*, **64**, 4024–4043.
- Dziak, J. J., Lanza, S. T., and Tan, X. (2014). Effect size, statistical power and sample size requirements for the bootstrap likelihood ratio test in latent class analysis. *Structural Equation Modeling*, **21**, 534–552.
- Dziak, J. J., Li, R., Tan, X., Shiffman, S., and Shiyko, M. (2015). Modeling intensive longitudinal data with mixtures of nonparametric trajectories and time-varying effects. *Psychological Methods*, **20** 4, 444–69.
- Dziak, J. J., Bray, B. C., Zhang, J.-T., Zhang, M., and Lanza, S. T. (2016). Comparing the performance of improved classify-analyze approaches in latent profile analysis. *Methodology*, **12**, 107–116.
- Eddy, S. R. (2004). What is a hidden Markov model? *Nature Biotechnology*, **22**, 1315–1316.
- Fonseca, J. R. S. and Cardoso, M. G. M. S. (2007). Mixture-model cluster analysis using information theoretical criteria. *Intelligent Data Analysis*, **11**, 155–173.



- Foster, D. P. and George, E. I. (1994). The Risk Inflation Criterion for multiple regression. *Annals of Statistics*, **22**, 1947–1975.
- Gelman, A. and Rubin, D. (1995). Avoiding model selection in Bayesian social research. *Sociological Methodology*, **25**, 165–173.
- George, E. I. (2000). The variable selection problem. *Journal of the American Statistical Association*, **95**, 1304–1308.
- Gibson, G. J., Streftaris, G., and Thong, D. (2018). Comparison and assessment of epidemic models. *Statistical Science*, **33**, 19–33.
- Gigerenzer, G. and Marewski, J. N. (2015). Surrogate science: The idol of a universal method for scientific inference. *Journal of Management*, **41**, 421–440.
- Golub, G. H., Heath, M., and Wahba, G. (1979). Generalized cross-validation as a method for choosing a good ridge parameter. *Technometrics*, **21**, 215–223.
- Goodman, S. (2008). A dirty dozen: Twelve *p*-value misconceptions. *Seminars in Hepatology*, **45**, 135–140.
- Gupta, M. R. and Chen, Y. (2010). Theory and use of the EM algorithm. *Foundations and Trends in Signal Processing*, **4**, 223–296.
- Hastie, T., Tibshirani, R., and Friedman, J. (2001). *The elements of statistical learning: Data mining, inference and prediction*. Springer, New York, NY.
- Hoeting, J. A., Madigan, D., Raftery, A. E., and Volinsky, C. T. (1999). Bayesian model averaging: A tutorial. *Statistical Science*, **14**, 382–417.
- Hurvich, C. M. and Tsai, C. (1989). Regression and time series model selection in small samples. *Biometrika*, **76**, 297–307.
- Jayaswal, V., Wong, T. K. F., Robinson, J., Poladian, L., and Jermiin, L. S. (2014). Mixture models of nucleotide sequence evolution that account for heterogeneity in the substitution process across sites and across lineages. *Systematic Biology*, **63**, 726–742.
- Johnson, J. B. and Omland, K. S. (2004). Model selection in ecology and evolution. *Trends in ecology and evolution*, **19**, 101–8.

- Kadane, J. B. and Lazar, N. A. (2004). Methods and criteria for model selection. *Journal of the American Statistical Association*, **99**, 279–290.
- Kalyaanamoorthy, S., Minh, B. Q., Wong, T. F. K., von Haeseler, A., and Jermiin, L. S. (2017). ModelFinder: fast model selection for accurate phylogenetic estimates. *Nature Methods*, **14**, 587–589.
- Kass, R. E. and Raftery, A. E. (1995). Bayes factors. *Journal of the American Statistical Association*, **90**, 773–795.
- Kass, R. E. and Wasserman, L. (1995). A reference Bayesian test for nested hypotheses and its relationship to the Schwartz criterion. *Journal of the American Statistical Association*, **90**, 928–34.
- Kieseppä, I. A. (2003). AIC and large samples. *Philosophy of Science*, **70**, 1265–1276.
- Kuha, J. (2004). AIC and BIC: Comparisons of assumptions and performance. *Sociological Methods and Research*, **33**, 188–229.
- Lazarsfeld, P. F. and Henry, N. W. (1968). *Latent structure analysis*. Houghton Mifflin, Boston.
- Leeb, H. (2008). Evaluation and selection of models for out-of-sample prediction when the sample size is small relative to the complexity of the data-generating process. *Bernoulli*, **14**, 661–690.
- Lefort, V., Longueville, J. E., and Gascuel, O. (2017). SMS: Smart model selection in PhyML. *Molecular Biology and Evolution*, **34**, 2422–2424.
- Leroux, B. G. (1992). Consistent estimation of a mixing distribution. *Annals of Statistics*, **20**, 1350–1360.
- Li, R. and Marron, J. S. (2005). Local likelihood SiZer map. *Sankhyā: The Indian Journal of Statistics*, **67**, 476–98.
- Lin, T. H. and Dayton, C. M. (1997). Model selection information criteria for non-nested latent class models. *Journal of Educational and Behavioral Statistics*, **22**, 249–264.

- Lubke, G. H., Stephens, S. H., Lessem, J. M., Hewitt, J. K., and Ehringer, M. A. (2012). The chrna5/a3/b4 gene cluster and tobacco, alcohol, cannabis, inhalants and other substance use initiation: Replication and new findings using mixture analysis. *Behavioral Genetics*, **42**, 636–646.
- McLachlan, G. and Peel, D. (2000). *Finite mixture models*. Wiley, New York.
- Mestres, A. C., Bochkina, N., and Mayer, C. (2018). Selection of the regularization parameter in graphical models using network characteristics. *Journal of Computational and Graphical Statistics*, **27**, 323–333.
- Miller, A. J. (2002). *Subset selection in regression*. Chapman & Hall, New York, 2nd edition.
- Murtaugh, P. A. (2014). In defense of  $p$  values. *Ecology*, **95**, 611–617.
- Narisetty, N. N. and He, X. (2014). Bayesian variable selection with shrinking and diffusing priors. *Annals of Statistics*, **42**, 789–817.
- Nylund, K. L., Asparouhov, T., and Muthén, B. O. (2007). Deciding on the number of classes in latent class analysis and growth mixture modeling: A Monte Carlo simulation study. *Structural Equation Modeling*, **14**, 535–569.
- Pan, R., Wang, H., and Li, R. (2016). Ultrahigh-dimensional multiclass linear discriminant analysis by pairwise sure independence screening. *Journal of the American Statistical Association*, **111**, 169–179.
- Peterman, R. M. (1990). The importance of reporting statistical power: the forest decline and acidic deposition example. *Ecology*, **71**, 2024–2027.
- Pitt, M. A. and Myung, I. J. (2002). When a good fit can be bad. *Trends in Cognitive Sciences*, **6**, 421–425.
- Pohle, J., Langrock, R., van Beest, F. M., and Schmidt, N. M. (2017). Selecting the number of states in hidden markov models: Pragmatic solutions illustrated using animal movement. *Journal of Agricultural, Biological and Environmental Statistics*, **22**, 270–293.

- Posada, D. (2008). jModelTest: Phylogenetic model averaging. *Molecular Biology and Evolution*, **25**, 1253–1256.
- Posada, D. and Buckley, T. R. (2004). Model selection and model averaging in phylogenetics: Advantages of Akaike Information Criterion and Bayesian approaches over likelihood ratio tests. *Systematic Biology*, **53**, 793–808.
- Posada, D. and Crandall, K. A. (2001). Selecting the best-fit model of nucleotide substitution. *Systematic Biology*, **50**, 580–601.
- Pötscher, B. M. (1991). Effects of model selection on inference. *Econometric Theory*, **7**, 163–185.
- R Development Core Team (2010). *R: A Language and Environment for Statistical Computing*. R Foundation for Statistical Computing, Vienna, Austria.
- Raftery, A. E. (1995). Bayesian model selection in social research. *Sociological Methodology*, **25**, 111–163.
- Raftery, A. E. (1996). Approximate Bayes factors and accounting for model uncertainty in generalised linear models. *Biometrika*, **83**, 251–266.
- Rao, C. R. and Wu, Y. (1989). A strongly consistent procedure for model selection in a regression problem. *Biometrika*, **76**, 369–374.
- Rau, A. and Maugis, C. (2018). Transformation and model choice for rna-seq co-expression analysis. *Briefings in bioinformatics*, **19** 3, 425–436.
- Rissanen, J. (1978). Modeling by shortest data description. *Automatica*, **14**, 465–471.
- Schwarz, G. (1978). Estimating the dimension of a model. *Annals of Statistics*, **6**, 461–464.
- Sclove, S. L. (1987). Application of model-selection criteria to some problems in multivariate analysis. *Psychometrika*, **52**, 333–43.
- Shao, J. (1993). Linear model selection by cross-validation. *Journal of the American Statistical Association*, **88**, 486–494.

- Shao, J. (1997). An asymptotic theory for linear model selection. *Statistica Sinica*, **7**, 221–264.
- Shibata, R. (1981). An optimal selection of regression variables. *Biometrika*, **68**, 45–54.
- Shibata, R. (1986). Consistency of model selection and parameter estimation. *Journal of Applied Probability*, **23**, 127–141.
- Söderström, T. (1977). On model structure testing in system identification. *International Journal of Control*, **26**, 1–18.
- Spiegelhalter, D. J., Best, N. G., Carlin, B. P., and van der Linde, A. (2002). Bayesian measures of model complexity and fit. *Journal of the Royal Statistical Society, B*, **64**, 583–639.
- Stine, R. A. (2004). Model selection using information theory and the MDL principle. *Sociological Methods & Research*, **33**, 230–260.
- Stoica, P., Selén, Y., and Li, J. (2004). On information criteria and the generalized likelihood ratio test of model order selection. *IEEE Signal Processing Letters*, **11**, 794–797.
- Stone, M. (1977). An asymptotic equivalence of choice of model by cross-validation and Akaike’s criterion. *Journal of the Royal Statistical Society, B*, **39**, 44–47.
- Sugiura, N. (1978). Further analysis of the data by Akaike’s Information Criterion and the finite corrections. *Communications in Statistics, Theory, and Methods*, **A7**, 13–26.
- Tein, J.-Y., Coxe, S., and Cham, H. (2013). Statistical power to detect the correct number of classes in latent profile analysis. *Structural Equation Modeling*, **20**, 640–657.
- Teräsvirta, T. and Mellin, I. (1986). Model selection criteria and model selection tests in regression models. *Scandinavian Journal of Statistics*, **13**, 159–171.
- Tibshirani, R. and Knight, K. (1999). The covariance inflation criterion for adaptive model selection. *Journal of the Royal Statistical Society, B*, **61**, 529–546.

- van der Hoeven, N. (2005). The probability to select the correct model using likelihood-ratio based criteria in choosing between two nested models of which the more extended one is true. *Journal of Statistical Planning and Inference*, **135**, 477–86.
- Vrieze, S. I. (2012). Model selection and psychological theory: A discussion of the differences between the Akaike Information Criterion (AIC) and the Bayesian Information Criterion (BIC). *Psychological Methods*, **17**, 228–243.
- Wang, H., Li, R., and Tsai, C.-L. (2007). Tuning parameter selectors for the smoothly clipped absolute deviation method. *Biometrika*, **94** **3**, 553–568.
- Wang, Y., Xu, M., Wang, Z., Tao, M., Zhu, J., Wang, L., Li, R., Berceci, S. A., and Wu, R. (2012). How to cluster gene expression dynamics in response to environmental signals. *Briefings in bioinformatics*, **13** **2**, 162–74.
- Wasserman, L. (2000). Bayesian model selection and model averaging. *Journal of Mathematical Psychology*, **44**, 92–107.
- Weakliem, D. L. (1999). A critique of the Bayesian Information Criterion for model selection. *Sociological Methods and Research*, **27**, 359–397.
- Wu, C. and Ma, S. (2015). A selective review of robust variable selection with applications in bioinformatics. *Briefings in bioinformatics*, **16** **5**, 873–83.
- Wu, Q. (2009). *Class extraction and classification accuracy in latent class models*. Ph.D. thesis, Pennsylvania State University.
- Yang, C. (2006). Evaluating latent class analysis models in qualitative phenotype identification. *Computational Statistics and Data Analysis*, **50**, 1090–1104.
- Yang, C. and Yang, C. (2007). Separating latent classes by information criteria. *Journal of Classification*, **24**, 183–203.
- Yang, Y. (2005). Can the strengths of AIC and BIC be shared? a conflict between model identification and regression estimation. *Biometrika*, **92**, 937–950.

Ye, M., Wang, Z., Wang, Y., and Wu, R. (2015). A multi-poisson dynamic mixture model to cluster developmental patterns of gene expression by rna-seq. *Briefings in Bioinformatics*, **16**(2), 205–215.

Zhang, P. (1993). On the convergence rate of model selection criteria. *Communications in Statistics: Theory and Methods*, **22**, 2765–2775.

Zucchini, W. (2000). An introduction to model selection. *Journal of Mathematical Psychology*, **44**, 41–61.
